# Supplementary material for: The prognostic value of tumor-infiltrating T lymphocytes in ovarian cancer
Source: PubMed Central journal article supplement (PMC5362510; doi:10.18632/oncotarget.14919), 2017-01-31
Supplement: oncotarget-08-15621-s001.pdf [file oncotarget-08-15621-s001.pdf]

# The prognostic value of tumor-infiltrating T lymphocytes in ovarian cancer

## SUPPLEMENTARY FIGURES

A

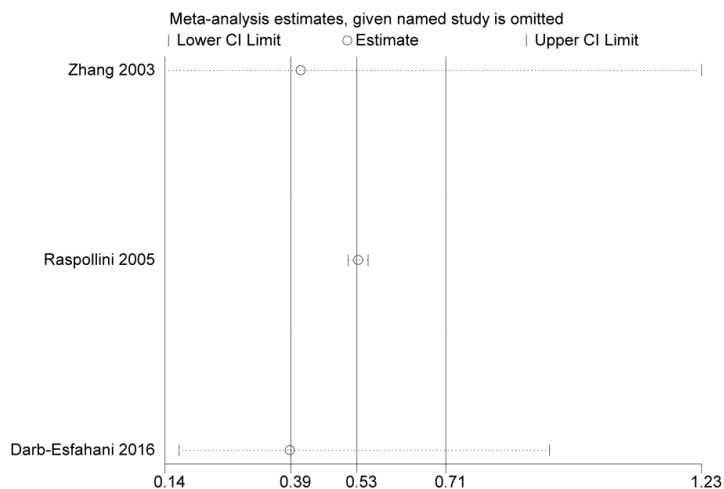

B

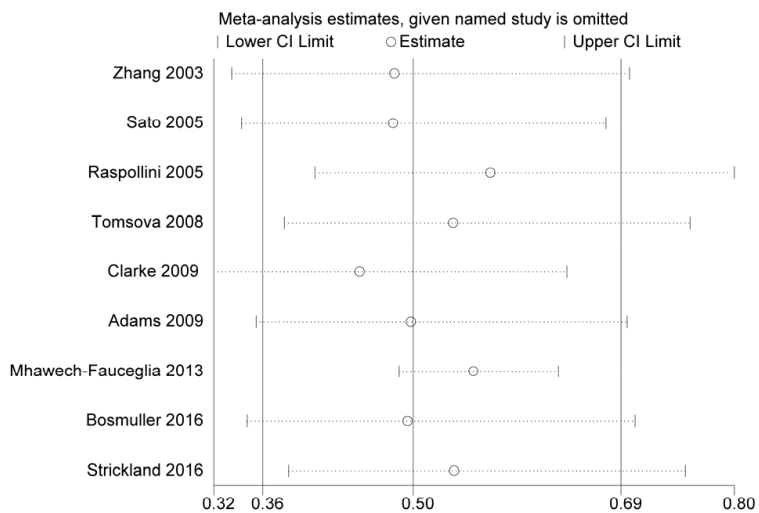

**Supplementary Figure 1:** One-way sensitivity analysis confirmed the effect of intraepithelial CD3<sup>+</sup> TILs on PFS **A.** and OS **B.** in ovarian cancer.

A

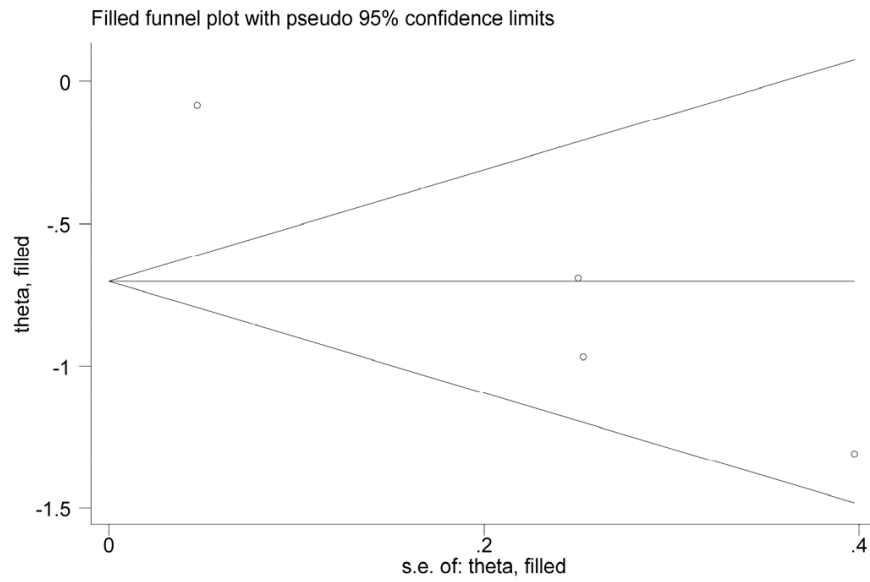

B

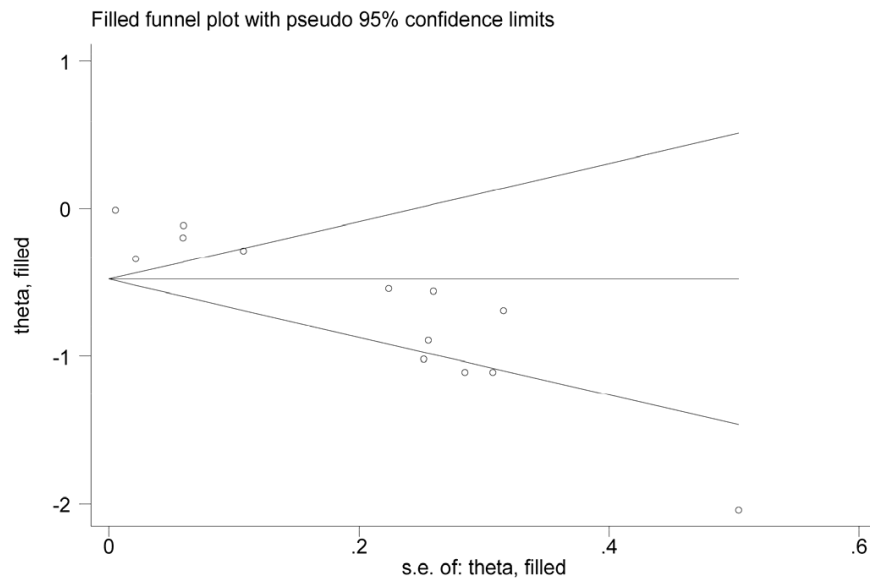

Supplementary Figure 2: The trim-and-fill analysis indicated that there might be no missing studies for both PFS A. and OS B.

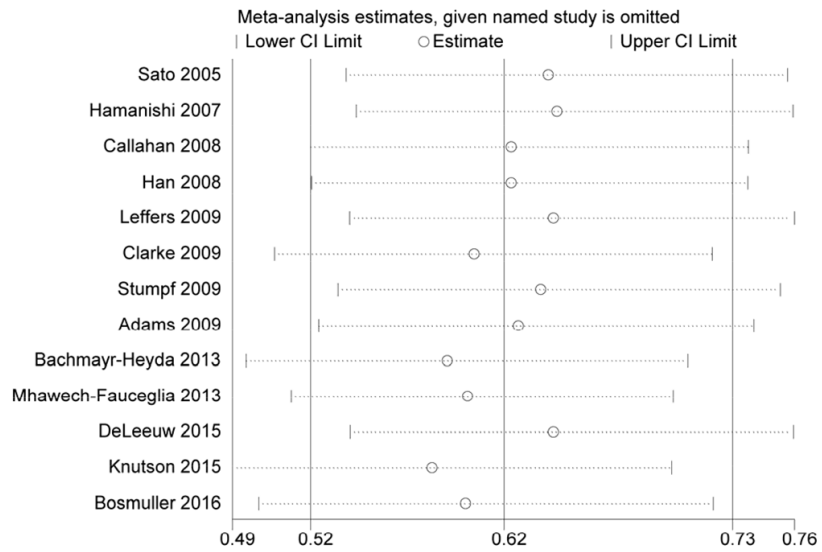

**Supplementary Figure 3: One-way sensitivity analysis confirmed the effect of intraepithelial CD8<sup>+</sup> TILs on OS in ovarian cancer.**

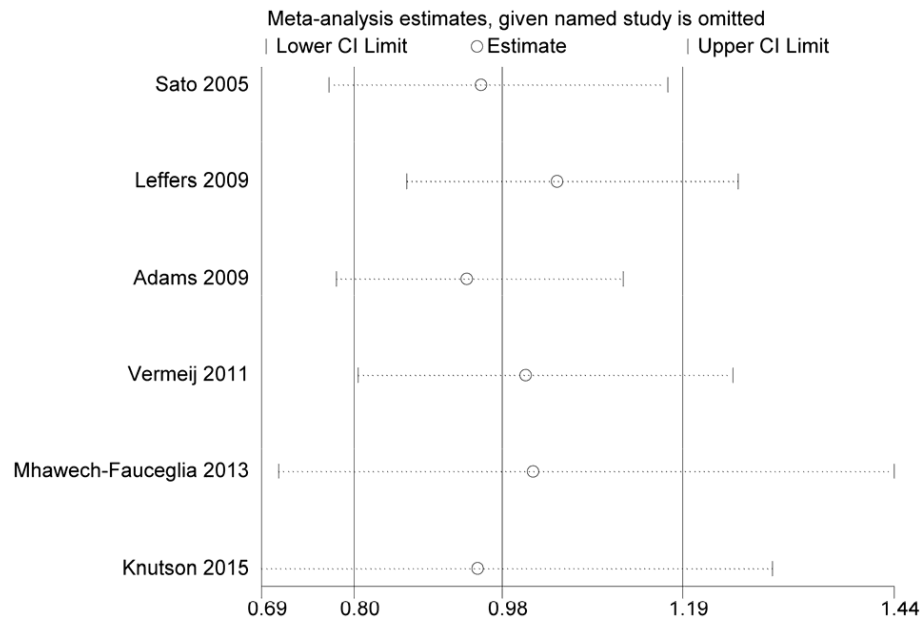

**Supplementary Figure 4: One-way sensitivity analysis confirmed the effect of intraepithelial FoxP3<sup>+</sup> TILs on OS in ovarian cancer.**

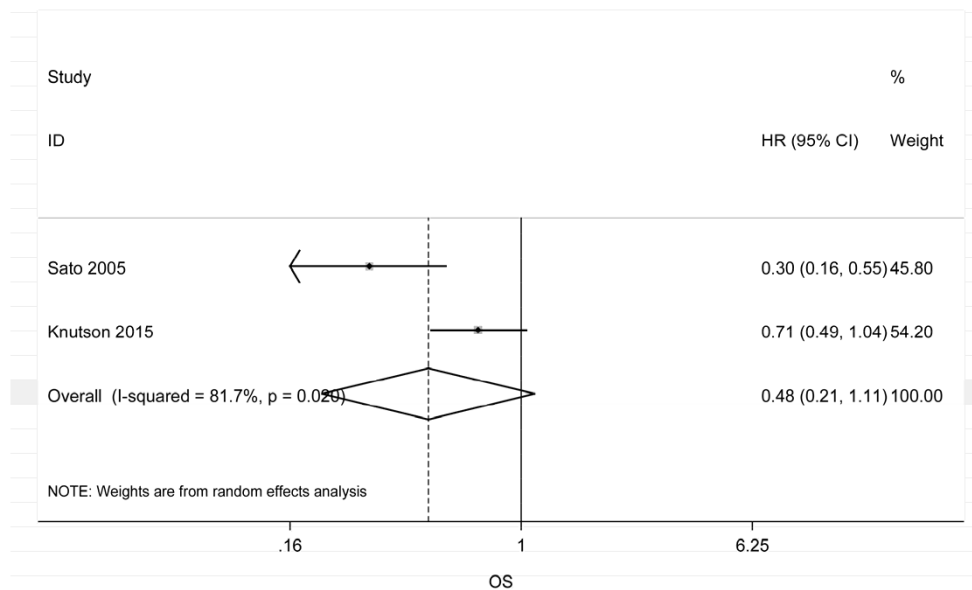

**Supplementary Figure 5: Meta-analysis of the HR for OS/DSS for ovarian cancer patients depending on CD8<sup>+</sup>/CD4<sup>+</sup> ratio status, random effects model.**

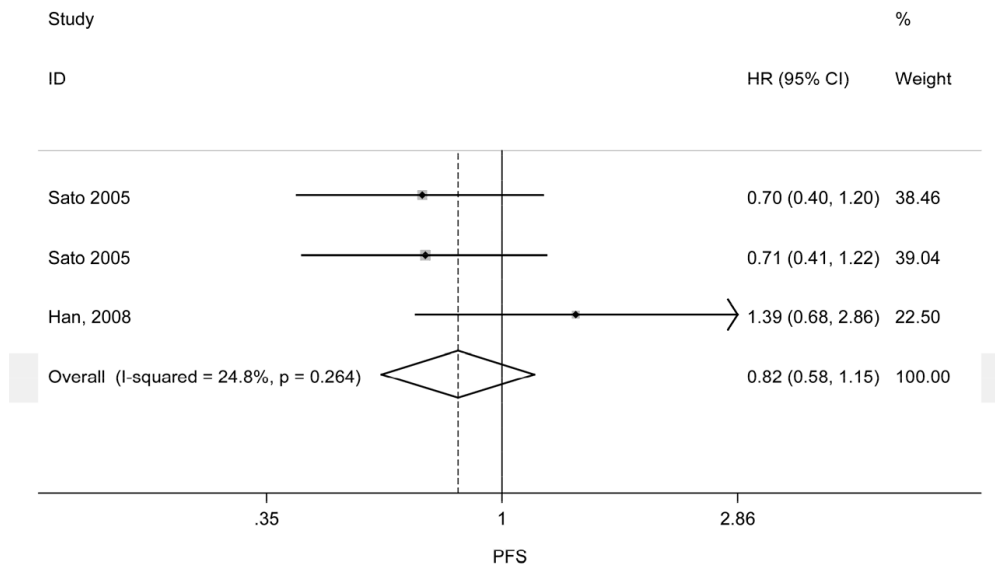

**Supplementary Figure 6: Meta-analysis of the HR for OS/DSS for ovarian cancer patients depending on stromal TILs status, fixed effects model.**
